# Supplementary material
Source: PubMed Central journal article supplement (PMC8132595)
Supplement: NIHMS1694201-supplement-1.pdf [file NIHMS1694201-supplement-1.pdf]

## Supplementary Index

**A. Decisional uncertainty subscale of the Decisional Conflict Scale**

Would you agree or disagree with the following statements?

|                                            |                |       |                           |          |                   |
|--------------------------------------------|----------------|-------|---------------------------|----------|-------------------|
| "I am clear about the best choice for me." | Strongly agree | Agree | Neither agree or disagree | Disagree | Strongly disagree |
| "I feel sure about what to choose."        | Strongly agree | Agree | Neither agree or disagree | Disagree | Strongly disagree |
| "This decision is easy for me to make"     | Strongly agree | Agree | Neither agree or disagree | Disagree | Strongly disagree |

Each item is rated on a 5-point scale from 0 indicating strongly agree to 4 indicating strongly disagree. The 3 items are summed, divided by 3, and then multiplied by 25. Score range 0-100. Higher scores indicated increased uncertainty about the best choice. Two scores are issued for each patient: a baseline score and a post-video score obtained within 24 hours after watching the video.

**B. Knowledge instrument**

|                                                                                                                                                                                                |          |           |          |
|------------------------------------------------------------------------------------------------------------------------------------------------------------------------------------------------|----------|-----------|----------|
| If I decide to undergo palliative radiation treatment, there is a chance I will be cured of my cancer.                                                                                         | True     | False     | Unsure   |
| Palliative radiation treatment must be started and completed while I remain hospitalized.                                                                                                      | True     | False     | Unsure   |
| I can begin my radiation treatment here and continue it at my local community hospital outside of MSKCC after I am discharged.                                                                 | True     | False     | Unsure   |
| Once I begin seeing a specialist in palliative care, I will not be able to continue receiving treatment for my cancer from my other doctors (e.g. medical, surgical, or radiation oncologist). | True     | False     | Unsure   |
| "Palliative Care" means the same thing as "Hospice Care."                                                                                                                                      | True     | False     | Unsure   |
| How long is a course of palliative radiation therapy, most commonly?                                                                                                                           | <10 days | 2-3 weeks | >3 weeks |

Each correct response is worth one point. The total score for each patient is calculated by summing the number of correctly answered questions, dividing by six, then multiplying by 100. Score range is 0-100. Higher scores indicated higher knowledge levels. Two scores are issued for each patient: a baseline score and a post-video score obtained within 24 hours after watching the video.

**C. Treatment readiness (1 = most ready; 10 = not ready at all)**

|                                                                                                                        |   |   |   |   |   |   |   |   |   |    |
|------------------------------------------------------------------------------------------------------------------------|---|---|---|---|---|---|---|---|---|----|
| With the information you know now, how ready do you feel to consent to palliative radiation therapy?                   | 1 | 2 | 3 | 4 | 5 | 6 | 7 | 8 | 9 | 10 |
| If you chose a number between 5 and 10, please state your reasons here.                                                |   |   |   |   |   |   |   |   |   |    |
| With the information you know now, would you be interested in scheduling a visit with a specialist in palliative care? | 1 | 2 | 3 | 4 | 5 | 6 | 7 | 8 | 9 | 10 |
| If you chose a number between 5 and 10, please state your reasons here.                                                |   |   |   |   |   |   |   |   |   |    |

Two scores are generated for each patient: a baseline score and a post-video score obtained within 24 hours after watching the video.

**D. Impression of video intervention**

|                                                                                                       |                  |                      |                  |             |
|-------------------------------------------------------------------------------------------------------|------------------|----------------------|------------------|-------------|
| How helpful was the information on palliative radiation in making a decision about your medical care? | Very helpful     | Somewhat helpful     | A little helpful | Not helpful |
| Did you feel comfortable receiving information about palliative care services in a video format?      | Very comfortable | Somewhat comfortable | Not comfortable  | Don't know  |

| Would you recommend the video on palliative treatment to others facing a similar decision?                                                                                                                                                                                                                                                                                 | Definitely recommend it | Probably recommend it | Probably not recommend it | Definitely not recommend it |
|----------------------------------------------------------------------------------------------------------------------------------------------------------------------------------------------------------------------------------------------------------------------------------------------------------------------------------------------------------------------------|-------------------------|-----------------------|---------------------------|-----------------------------|
| Is there any information about palliative radiation you felt was missing from the video that should be added?                                                                                                                                                                                                                                                              |                         |                       |                           |                             |
| What did you like/not like about the video?                                                                                                                                                                                                                                                                                                                                |                         |                       |                           |                             |
| Responses to each 4-point question are treated as categorical variables and grouped. The number of responses in each category is tallied. Patients filled out the impressions survey within 24 hours after watching the video. To obtain a score (range 0-100), the scores of the three quantitatively assessed items were summed, dividing by 3 and multiplied by 33.333. |                         |                       |                           |                             |

Journal Pre-proof
